# Supplementary material for: The recycle of red mud as excellent SCR catalyst for removal of NOx
Source: Royal Society of Chemistry journal article supplement (doi:10.1039/c7ra10348d), 2017-01-01
Supplement: c7ra10348d1.pdf [file c7ra10348d1.pdf]

## Supporting Information for

# The recycle of red mud as excellent SCR catalyst for removal of NO<sub>x</sub>

Changming Li,<sup>a</sup> Hong Zeng,<sup>a,b</sup> Pingle Liu,<sup>b</sup> Jian Yu\*,<sup>a</sup> Feng Guo,<sup>a</sup> Guangwen Xu<sup>a,c</sup> and Zhan-  
guo Zhang<sup>d</sup>

<sup>a</sup> State Key Laboratory of Multi-phase Complex Systems, Institute of Process Engineering, Chinese Academy of Sciences, Beijing 100190, China

<sup>b</sup> School of Chemical Engineering, Xiangtan University, Xiangtan, Hunan 411105, PR China

<sup>c</sup> Institute of Industrial Chemistry and Energy technology, Shenyang University of Chemical Technology, Shenyang 110142, China

<sup>d</sup> National Institute of Advanced Industrial Science and Technology (AIST), 16-1 Onogawa, Tsukuba, 305-8569 Ibaraki, Japan

\* Corresponding author. Tel.: +86-10-82544886 (Jian Yu)

E-mail address: yujian@ipe.ac.cn;

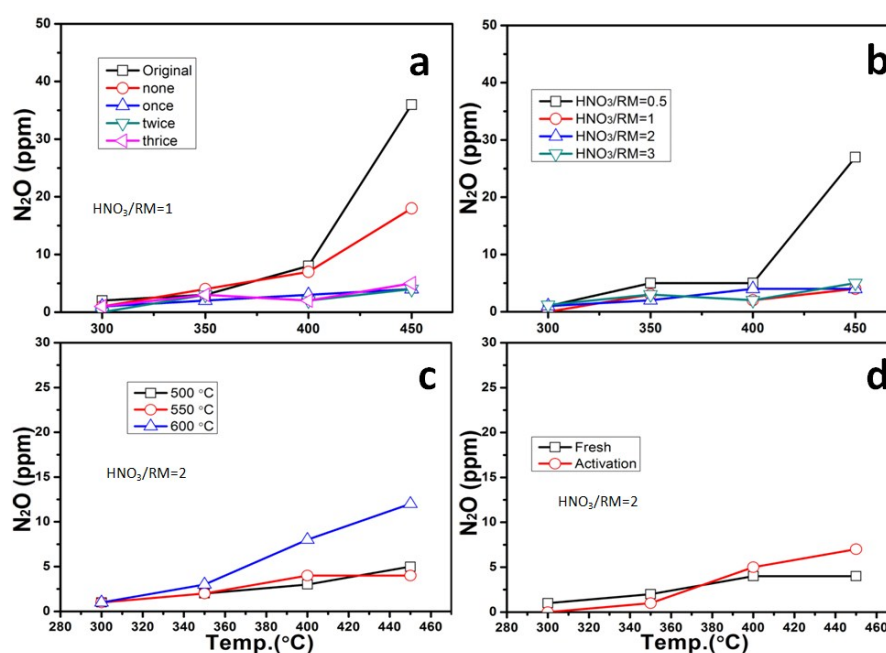

**Figure S1.** The detected concentration of N<sub>2</sub>O during the catalytic test in Figure 1.

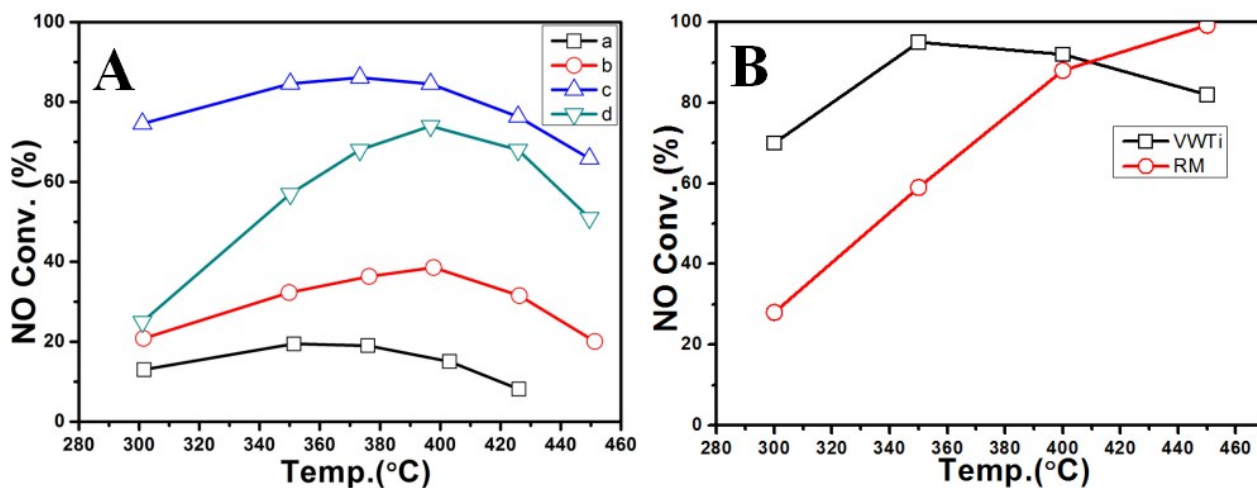

**Figure S2.** (A) The DeNO<sub>x</sub> performance of Fe<sub>2</sub>O<sub>3</sub>/SiO<sub>2</sub> (a), Fe<sub>2</sub>O<sub>3</sub>/Al<sub>2</sub>O<sub>3</sub> (b), Fe<sub>2</sub>O<sub>3</sub>/TiO<sub>2</sub> (c), Fe<sub>2</sub>O<sub>3</sub>/SiO<sub>2</sub>-Al<sub>2</sub>O<sub>3</sub>-TiO<sub>2</sub> (d) and (B) the VWTi catalyst without inactive additives together with RM catalyst.

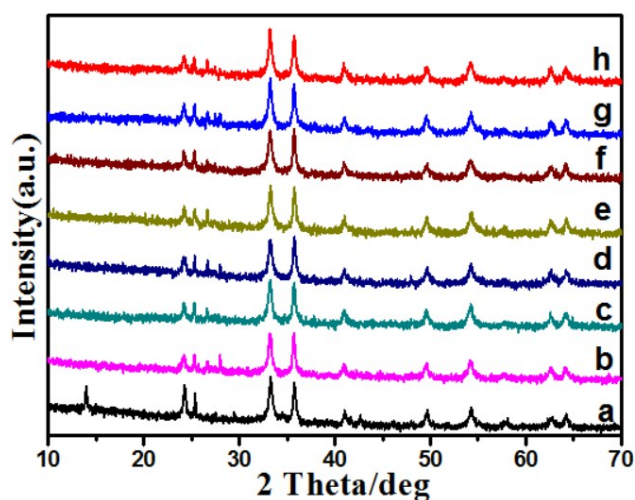

**Figure S3.** The XRD patterns of different RM samples: the calcinated original RM (a), the acid treated RM catalysts without washing (b), washed three times (c), the RM samples treated with the ratio of HNO<sub>3</sub>/RM at 0.5 (d), the RM samples treated with the ratio of HNO<sub>3</sub>/RM at 1 (e), the RM samples treated with the ratio of HNO<sub>3</sub>/RM at 2 (f), the RM catalysts calcinated at 500 °C (g) and 600 °C (h).

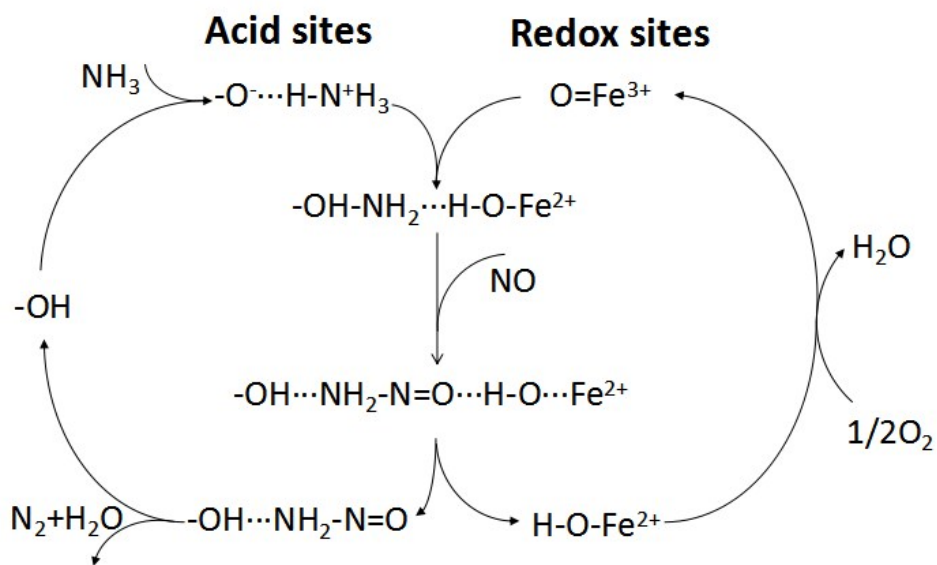

**Scheme S1** The possible Eley-Rideal mechanism over RM based catalyst at high temperature.
